# Supplementary material for: Template synthesis of CoSe2/Co3Se4 nanotubes: tuning of their crystal structures for photovoltaics and hydrogen evolution in alkaline medium
Source: Royal Society of Chemistry journal article supplement (doi:10.1039/c6ta10718d), 2017-01-01
Supplement: c6ta10718d1.pdf [file c6ta10718d1.pdf]

## Electronic Supplementary Information (ESI)

### **Template synthesis of CoSe<sub>2</sub>/Co<sub>3</sub>Se<sub>4</sub> nanotubes: tuning the crystal structures for photovoltaics and hydrogen evolution in alkaline medium**

Hongmei Li, Xing Qian,\* Changli Zhu, Xiancai Jiang, Li Shao and Linxi Hou\*

*College of Chemical Engineering, Fuzhou University, Xueyuan Road No. 2, Fuzhou 350116, China. \*E-mail: xingqian@fzu.edu.cn; lxhou@fzu.edu.cn.*

*Fax: +86-0591-2286 6244; Tel: +86-0591-2286 5220.*

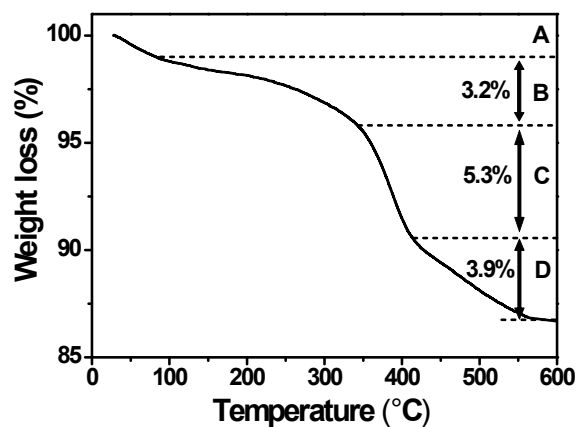

**Fig. S1** Thermogravimetric curve of Co<sub>3</sub>Se<sub>4</sub> NTs samples. This TGA has four distinct stage of weight losses. The first weight loss stage (A stage) ended at ~85 °C, stemming from evaporation of trace water. The second weight loss (B stage) at the temperature ranging from 85 to 340 °C was attributed to the Co<sub>3</sub>Se<sub>4</sub> reacting with Se to form o-CoSe<sub>2</sub>. The third weight loss (C stage) at the temperature ranging from 340 to 410 °C may be associated with the evaporation of Se. Following this, the o-CoSe<sub>2</sub> converted to c-CoSe<sub>2</sub> accompanying with the evaporation of Se at the temperature ranging from 410 to 600 °C (D stage).

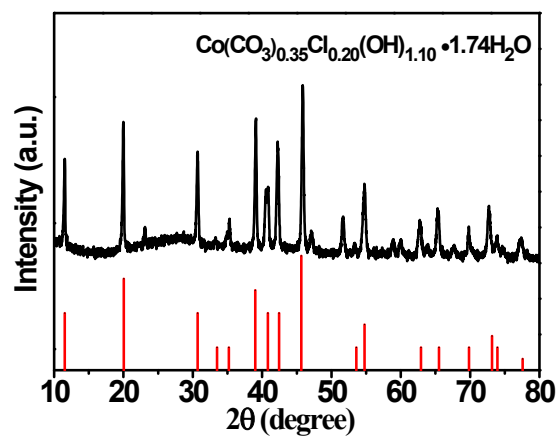

**Fig. S2** XRD patterns of the  $\text{Co}(\text{CO}_3)_{0.35}\text{Cl}_{0.20}(\text{OH})_{1.10} \cdot 1.74\text{H}_2\text{O}$  sample.

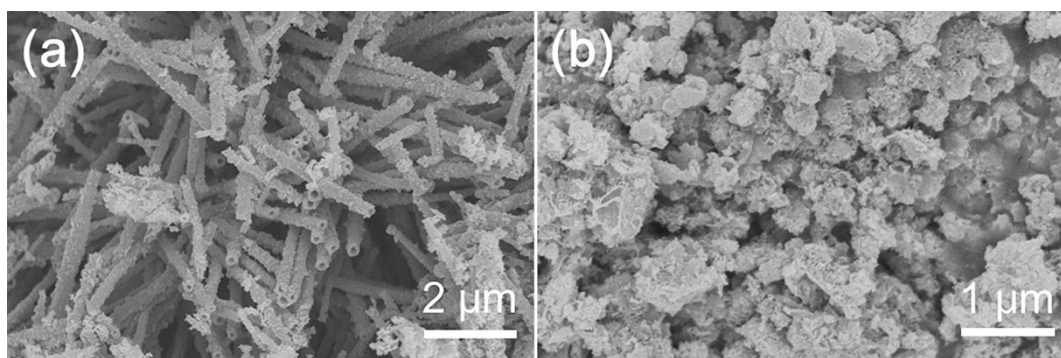

**Fig. S3** SEM images of the (a)  $\alpha$ - $\text{CoSe}_2$  and (b)  $\text{Co}_3\text{Se}_4$  NPs.

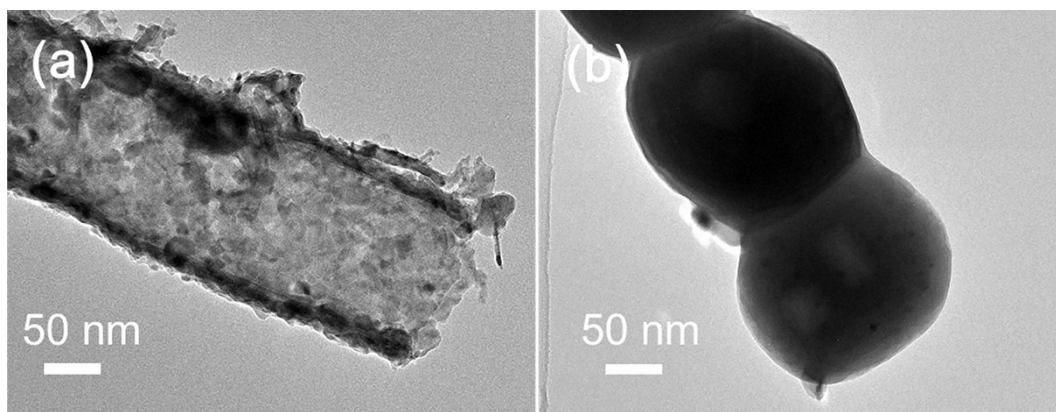

**Fig. S4** TEM images of the (a) o-CoSe<sub>2</sub> and (b) c-CoSe<sub>2</sub>.

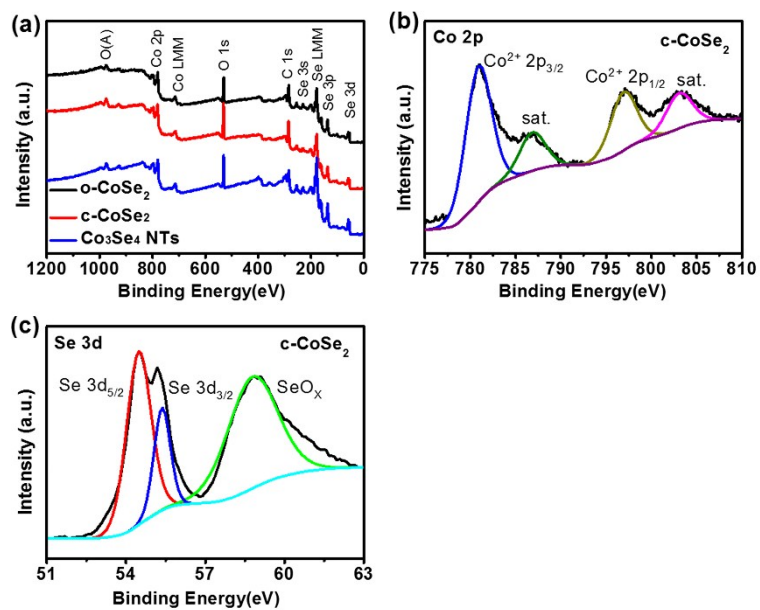

**Fig. S5** (a) The survey spectrum of o-CoSe<sub>2</sub>, c-CoSe<sub>2</sub> and Co<sub>3</sub>Se<sub>4</sub> NTs. (b) Co 2p XPS spectra of c-CoSe<sub>2</sub>. (c) Se 3d XPS spectra of c-CoSe<sub>2</sub>.

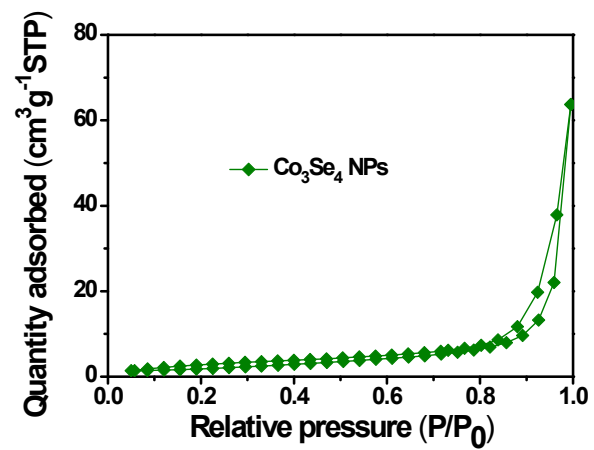

Fig. S6 N<sub>2</sub> adsorption-desorption isotherm of Co<sub>3</sub>Se<sub>4</sub> NPs.

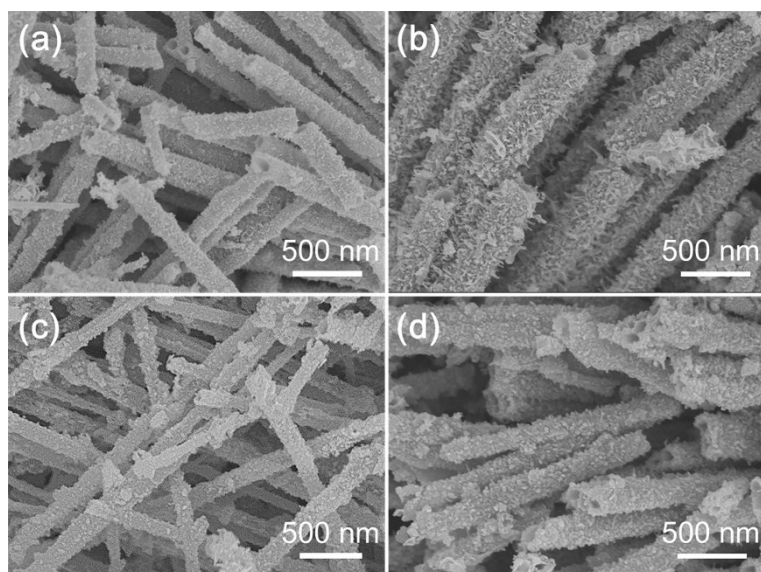

**Fig. S7** (a) and (b) SEM images of  $\text{Co}_3\text{Se}_4$  after the DSSC and HER tests, respectively. (c) and (d) SEM images of  $\text{o-CoSe}_2$  after the DSSC and HER tests, respectively.



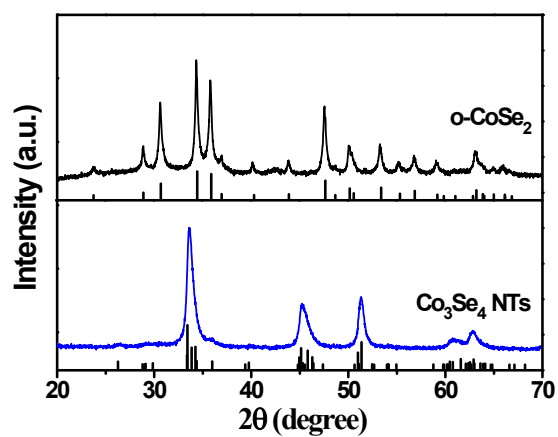

**Fig. S8** XRD patterns of the Co<sub>3</sub>Se<sub>4</sub> NTs and o-CoSe<sub>2</sub> after the HER stability test in 1.0 M KOH.

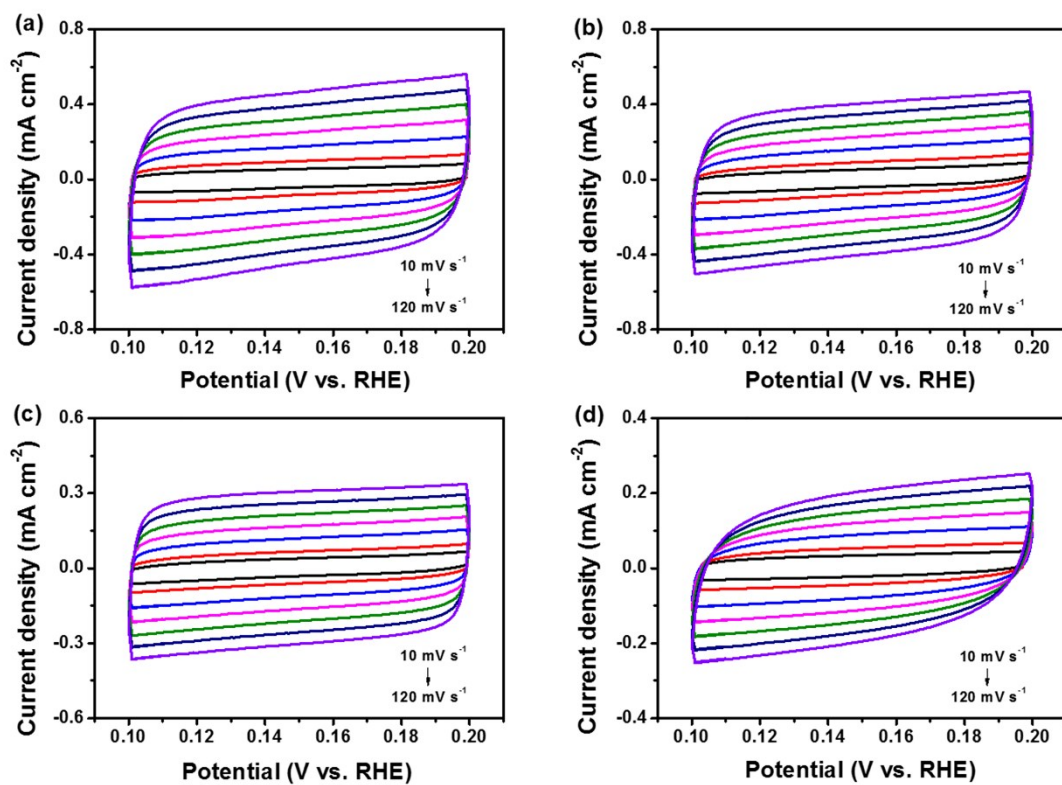

**Fig. S9** Cyclic voltammograms of (a) *o*-CoSe<sub>2</sub>, (b) *c*-CoSe<sub>2</sub>, (c) Co<sub>3</sub>Se<sub>4</sub> NTs and (d) Co<sub>3</sub>Se<sub>4</sub> NPs at different scan rates (10, 20, 40, 60, 80, 100 and 120 mV s<sup>-1</sup>) in 1.0 M KOH.

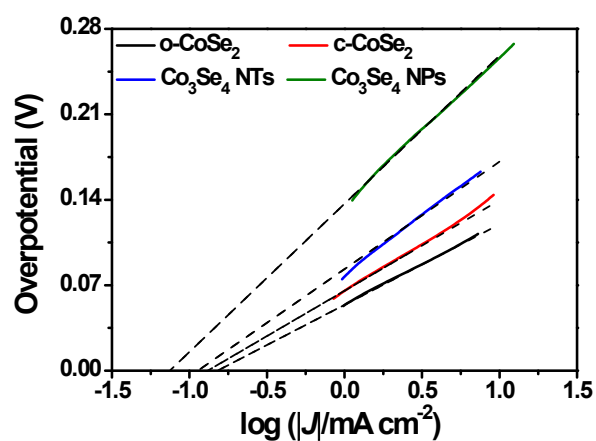

**Fig. S10** Calculation of exchange current density of o-CoSe<sub>2</sub>, c-CoSe<sub>2</sub>, Co<sub>3</sub>Se<sub>4</sub> NTs and Co<sub>3</sub>Se<sub>4</sub> NPs.

The exchange current density ( $J_0$ ) was calculated using extrapolation methods. When the overpotential value is 0, the  $\log(J)$  values for o-CoSe<sub>2</sub>, c-CoSe<sub>2</sub>, Co<sub>3</sub>Se<sub>4</sub> NTs and Co<sub>3</sub>Se<sub>4</sub> NPs are  $-0.83$ ,  $-0.89$ ,  $-0.96$  and  $-1.12$ , respectively. Based on Tafel equations,  $J_0$  values for o-CoSe<sub>2</sub>, c-CoSe<sub>2</sub>, Co<sub>3</sub>Se<sub>4</sub> NTs and Co<sub>3</sub>Se<sub>4</sub> NPs were calculated to be  $0.15$ ,  $0.13$ ,  $0.11$  and  $0.08$  mA cm<sup>-2</sup>, respectively.

**Table S1** Comparison of HER performance in alkaline medium for as-obtained samples with other non-noble metal-based catalysts.

| Catalysts                            | Onset potential (mV) | $\eta_{10}$ (mV) | Tafel slope (mV decade <sup>-1</sup> ) | References |
|--------------------------------------|----------------------|------------------|----------------------------------------|------------|
| Ni <sub>2</sub> P nanoparticles      | 100                  | 225              | 100                                    | 1          |
| Ni-Co-P-300                          | —                    | 150              | 60.6                                   | 2          |
| CoP nanowire arrays                  | 80                   | 209              | 129                                    | 3          |
| Co@N-C                               | —                    | 210              | 108                                    | 4          |
| Ni <sub>5</sub> P <sub>4</sub> films | —                    | 150              | 53                                     | 5          |
| CoO <sub>x</sub> /CN                 | 85                   | 232              | 114                                    | 6          |
| NiP <sub>2</sub> nanosheet arrays    | 74                   | 102              | 65                                     | 7          |
| WN nanorod arrays                    | —                    | 285              | 170                                    | 8          |
| MoB                                  | 140                  | 225              | 59                                     | 9          |
| Co-Ni-B                              | —                    | 133              | 121                                    | 10         |
| CoS <sub>2</sub> pyramids            | —                    | 244              | 133                                    | 11         |
| CoSe <sub>2</sub> /CF                | —                    | 95               | 52                                     | 12         |
| o-CoSe <sub>2</sub>                  | 54                   | 124              | 65.9                                   | This work  |

## References

- 1 L. G. Feng, H. Vrabel, M. Bensimon and X. L. Hu, *Phys. Chem. Chem. Phys.*, 2014, **16**, 5917–5921.
- 2 Y. Feng, X.-Y. Yu and U. Paik, *Chem. Commun.*, 2016, **52**, 1633–1636.
- 3 J. Q. Tian, Q. Liu, A. M. Asiri and X. P. Sun, *J. Am. Chem. Soc.*, 2014, **136**, 7587–7590.
- 4 J. Wang, D. F. Gao, G. X. Wang, S. Miao, H. H. Wu, J. Y. Li and X. H. Bao, *J. Mater. Chem. A*, 2014, **2**, 20067–20074.
- 5 M. Ledendecker, S. Krick Calderon, C. Papp, H. P. Steinruck, M. Antonietti and M. Shalom, *Angew. Chem., Int. Ed.*, 2015, **54**, 12361–12365.
- 6 H. Y. Jin, J. Wang, D. F. Su, Z. Z. Wei, Z. F. Pang and Y. Wang, *J. Am. Chem. Soc.*, 2015, **137**, 2688–2694.
- 7 P. Jiang, Q. Liu and X. P. Sun, *Nanoscale*, 2014, **6**, 13440–13445.
- 8 J. L. Shi, Z. H. Pu, Q. Liu, A. M. Asiri, J. M. Hu and X. P. Sun, *Electrochim. Acta*, 2015, **154**, 345–351.

- 9 H. Vrubel and X. L. Hu, *Angew. Chem., Int. Ed.*, 2012, **51**, 12703–12706.
- 10 S. Gupta, N. Patel, R. Fernandes, R. Kadrekar, A. Dashora, A. K. Yadav, D. Bhattacharyya, S. N. Jha, A. Miotello and D. C. Kothari, *Appl. Catal., B*, 2016, **192**, 126–133.
- 11 H. C. Zhang, Y. J. Li, G. X. Zhang, P. B. Wan, T. H. Xu, X. C. Wu and X. P. Sun, *Electrochim. Acta*, 2014, **148**, 170–174.
- 12 C. S. Sun, Q. C. Dong, J. Yang, Z. Y. Dai, J. J. Lin, P. Chen, W. Huang and X. C. Dong, *Nano Res.*, 2016, **9**, 2234–2243.
